# Supplementary material for: The Etiology, Antibiotic Therapy and Outcomes of Bacteremic Skin and Soft-Tissue Infections in Onco-Hematological Patients
Source: MDPI journal article supplement (doi:10.3390/antibiotics12121722), 2023-12-13
Supplement: s1 [file s1]

**Supplementary Table 1. Clinical features, etiology, antibiotic therapy and outcomes of patients with necrotizing fasciitis.**

|   | Gender/<br>Age (years) | Underlying<br>disease | Risk factors                                    | Organism                                               | Localization     | Septic<br>shock | Radiological<br>imaging | Empirical antibiotic<br>therapy             | Surgery | Outcome                |
|---|------------------------|-----------------------|-------------------------------------------------|--------------------------------------------------------|------------------|-----------------|-------------------------|---------------------------------------------|---------|------------------------|
| 1 | Female/66              | Acute<br>leukemia     | Steroids                                        | <i>E. coli</i>                                         | Limb             | Yes             | CT                      | Amoxicillin-<br>clavulanate<br>(inadequate) | No      | Death                  |
| 2 | Female/49              | Allogeneic<br>HSCT    | Steroids                                        | MDR- <i>P.<br/>aeruginosa</i>                          | Head and<br>neck | No              | CT                      | Amikacin + colistin                         | No      | ICU admission<br>Death |
| 3 | Male/56                | Melanoma<br>(Foot)    |                                                 | <i>S. agalactiae</i>                                   | Limb             | No              | CT                      | Amoxicillin-<br>clavulanate +<br>daptomycin | Yes     | Alive                  |
| 4 | Female/57              | Acute<br>leukemia     | Steroids                                        | <i>K. pneumoniae</i>                                   | Limb             | No              |                         | Carbapenem                                  | No      | Death                  |
| 5 | Male/46                | Acute<br>leukemia     | Neutropenia<br>Steroids<br>Diabetes<br>mellitus | <i>P. aeruginosa</i><br>and <i>S. mitis</i>            | Limb             | Yes             | CT /MR                  | Amoxicillin-<br>clavulanate +<br>daptomycin | Yes     | ICU admission<br>Alive |
| 6 | Male/75                | Prostate<br>cancer    | Steroids<br>Diabetes<br>mellitus                | <i>E. coli</i> and<br><i>Bacteroides<br/>uniformis</i> | Limb             | No              | CT                      | Carbapenem                                  | No      | ICU admission<br>Alive |

MDR: multidrug-resistant; CT: computed tomography; MR: magnetic resonance; ICU: intensive care unit.
